# Supplementary material for: Survival and prognostic factors for primary lung extranodal NK/T-cell lymphoma: a retrospective study of data from China and the SEER database
Source: Front Oncol. 2025 Jan 24;15:1496735. doi: 10.3389/fonc.2025.1496735 (PMC11802421; doi:10.3389/fonc.2025.1496735)
Supplement: Supplementary file 1 [file Table1.xlsx]

## Sheet: Sheet1
Age recode with single ages and 100+	Race recode (White, Black, Other)	Sex	Year of diagnosis	Site recode ICD-O-3/WHO 2008	Behavior recode for analysis	Primary Site - labeled	ICD-O-3 Hist/behav	RX Summ--Surg Prim Site (1998+)	RX Summ--Scope Reg LN Sur (2003+)	Radiation recode	RX Summ--Surg/Rad Seq	Chemotherapy recode (yes, no/unk)	COD to site recode	SEER cause-specific death classification	Survival months	Vital status recode (study cutoff used)	Sequence number	First malignant primary indicator	Patient ID	Marital status at diagnosis	Diagnostic Confirmation	SEER Combined Mets at DX-bone (2010+)	SEER Combined Mets at DX-brain (2010+)	SEER Combined Mets at DX-liver (2010+)	SEER Combined Mets at DX-lung (2010+)	CS extension (2004-2015)	CS lymph nodes (2004-2015)	CS mets at dx (2004-2015)	RX Summ--Surg Oth Reg/Dis (2003+)	Grade (thru 2017)	Grade Clinical (2018+)	Grade Pathological (2018+)	EOD Primary Tumor (2018+)	EOD Regional Nodes (2018+)	EOD Mets (2018+)	Tumor Size Summary (2016+)	CS site-specific factor 2 (2004-2017 varying by schema)	CS site-specific factor 3 (2004-2017 varying by schema)	CS site-specific factor 4 (2004-2017 varying by schema)	CS site-specific factor 5 (2004-2017 varying by schema)	Lymphoma - Ann Arbor Stage (1983-2015)	Lymphoma subtype recode/WHO 2008 (thru 2017)
88 years	White	Male	2011	NHL - Extranodal	Malignant	C34.3-Lower lobe, lung	9719/3: Extranodal NK-/T-cell lymphoma, nasal type	0	None	Beam radiation	No radiation and/or cancer-directed surgery	No/Unknown	Chronic Obstructive Pulmonary Disease and Allied Cond	Alive or dead of other cause	3	Dead	One primary only	Yes	5645649	Widowed	Positive histology	N/A	N/A	N/A	N/A	110	988	98	None; diagnosed at autopsy	NK cell; natural killer cell (1995+)	Blank(s)	Blank(s)	Blank(s)	Blank(s)	Blank(s)	Blank(s)	10	999	Blank(s)	Blank(s)	Stage I	2(b)2.4 NK/T-cell lymph, nasal-type/aggres NK leuk
39 years	Other (American Indian/AK Native, Asian/Pacific Islander)	Male	2006	NHL - Extranodal	Malignant	C34.9-Lung, NOS	9719/3: Extranodal NK-/T-cell lymphoma, nasal type	0	None	None/Unknown	No radiation and/or cancer-directed surgery	Yes	Alive	Alive or dead of other cause	166	Alive	One primary only	Yes	9056596	Married (including common law)	Positive histology	Blank(s)	Blank(s)	Blank(s)	Blank(s)	800	988	98	None; diagnosed at autopsy	NK cell; natural killer cell (1995+)	Blank(s)	Blank(s)	Blank(s)	Blank(s)	Blank(s)	Blank(s)	10	999	Blank(s)	Blank(s)	Stage IV	2(b)2.4 NK/T-cell lymph, nasal-type/aggres NK leuk
59 years	White	Male	2019	NHL - Extranodal	Malignant	C34.1-Upper lobe, lung	9719/3: Extranodal NK-/T-cell lymphoma, nasal type	0	Unknown or not applicable	None/Unknown	No radiation and/or cancer-directed surgery	No/Unknown	Alive	Alive or dead of other cause	0	Alive	3rd of 3 or more primaries	No	9193758	Married (including common law)	Positive histology	Unknown	Unknown	Unknown	Unknown	Blank(s)	Blank(s)	Blank(s)	None; diagnosed at autopsy	Blank(s)	8	8	700	888	88	999	Blank(s)	Blank(s)	Blank(s)	Blank(s)	Blank(s)	Blank(s)
60 years	Other (American Indian/AK Native, Asian/Pacific Islander)	Male	2017	NHL - Extranodal	Malignant	C34.9-Lung, NOS	9719/3: Extranodal NK-/T-cell lymphoma, nasal type	0	None	None/Unknown	No radiation and/or cancer-directed surgery	Yes	Non-Hodgkin Lymphoma	Dead (attributable to this cancer dx)	1	Dead	One primary only	Yes	24453091	Married (including common law)	Positive histology	Unknown	Unknown	Unknown	Unknown	Blank(s)	Blank(s)	Blank(s)	None; diagnosed at autopsy	NK cell; natural killer cell (1995+)	Blank(s)	Blank(s)	Blank(s)	Blank(s)	Blank(s)	999	999	999	Blank(s)	Blank(s)	Blank(s)	2(b)2.4 NK/T-cell lymph, nasal-type/aggres NK leuk
54 years	Other (American Indian/AK Native, Asian/Pacific Islander)	Male	2006	NHL - Extranodal	Malignant	C34.9-Lung, NOS	9719/3: Extranodal NK-/T-cell lymphoma, nasal type	0	Unknown or not applicable	None/Unknown	No radiation and/or cancer-directed surgery	Yes	Non-Hodgkin Lymphoma	Dead (attributable to this cancer dx)	1	Dead	One primary only	Yes	26895827	Married (including common law)	Positive histology	Blank(s)	Blank(s)	Blank(s)	Blank(s)	800	988	98	None; diagnosed at autopsy	T-cell	Blank(s)	Blank(s)	Blank(s)	Blank(s)	Blank(s)	Blank(s)	0	999	Blank(s)	Blank(s)	Stage IV	2(b)2.4 NK/T-cell lymph, nasal-type/aggres NK leuk
36 years	White	Female	2013	NHL - Extranodal	Malignant	C34.9-Lung, NOS	9719/3: Extranodal NK-/T-cell lymphoma, nasal type	0	None	None/Unknown	No radiation and/or cancer-directed surgery	Yes	Non-Hodgkin Lymphoma	Dead (attributable to this cancer dx)	0	Dead	One primary only	Yes	27345543	Single (never married)	Positive histology	N/A	N/A	N/A	N/A	800	988	98	None; diagnosed at autopsy	NK cell; natural killer cell (1995+)	Blank(s)	Blank(s)	Blank(s)	Blank(s)	Blank(s)	Blank(s)	999	999	Blank(s)	Blank(s)	Stage IV	2(b)2.4 NK/T-cell lymph, nasal-type/aggres NK leuk
86 years	Other (American Indian/AK Native, Asian/Pacific Islander)	Female	2015	NHL - Extranodal	Malignant	C34.3-Lower lobe, lung	9719/3: Extranodal NK-/T-cell lymphoma, nasal type	0	None	None/Unknown	No radiation and/or cancer-directed surgery	No/Unknown	Non-Hodgkin Lymphoma	Dead (attributable to this cancer dx)	0	Dead	One primary only	Yes	27495473	Divorced	Positive histology	N/A	N/A	N/A	N/A	110	988	98	None; diagnosed at autopsy	NK cell; natural killer cell (1995+)	Blank(s)	Blank(s)	Blank(s)	Blank(s)	Blank(s)	Blank(s)	10	999	Blank(s)	Blank(s)	Stage I	2(b)2.4 NK/T-cell lymph, nasal-type/aggres NK leuk
79 years	Other (American Indian/AK Native, Asian/Pacific Islander)	Male	2019	NHL - Extranodal	Malignant	C34.9-Lung, NOS	9719/3: Extranodal NK-/T-cell lymphoma, nasal type	0	Unknown or not applicable	None/Unknown	No radiation and/or cancer-directed surgery	Yes	Non-Hodgkin Lymphoma	Dead (attributable to this cancer dx)	2	Dead	One primary only	Yes	27825304	Widowed	Positive exfoliative cytology, no positive histology	No	No	No	No	Blank(s)	Blank(s)	Blank(s)	None; diagnosed at autopsy	Blank(s)	8	8	700	888	88	999	Blank(s)	Blank(s)	Blank(s)	Blank(s)	Blank(s)	Blank(s)
32 years	Other (American Indian/AK Native, Asian/Pacific Islander)	Female	2004	NHL - Extranodal	Malignant	C34.9-Lung, NOS	9719/3: Extranodal NK-/T-cell lymphoma, nasal type	0	None	None/Unknown	No radiation and/or cancer-directed surgery	No/Unknown	Non-Hodgkin Lymphoma	Dead (attributable to this cancer dx)	0	Dead	One primary only	Yes	34301173	Married (including common law)	Positive histology	Blank(s)	Blank(s)	Blank(s)	Blank(s)	999	988	98	None; diagnosed at autopsy	NK cell; natural killer cell (1995+)	Blank(s)	Blank(s)	Blank(s)	Blank(s)	Blank(s)	Blank(s)	999	999	Blank(s)	Blank(s)	Unknown	2(b)2.4 NK/T-cell lymph, nasal-type/aggres NK leuk
46 years	White	Male	2004	NHL - Extranodal	Malignant	C34.9-Lung, NOS	9719/3: Extranodal NK-/T-cell lymphoma, nasal type	0	Unknown or not applicable	Radiation, NOS method or source not specified	No radiation and/or cancer-directed surgery	Yes	Diabetes Mellitus	Alive or dead of other cause	6	Dead	One primary only	Yes	46409775	Married (including common law)	Positive histology	Blank(s)	Blank(s)	Blank(s)	Blank(s)	800	988	98	None; diagnosed at autopsy	T-cell	Blank(s)	Blank(s)	Blank(s)	Blank(s)	Blank(s)	Blank(s)	999	999	Blank(s)	Blank(s)	Stage IV	2(b)2.4 NK/T-cell lymph, nasal-type/aggres NK leuk
70 years	White	Female	2014	NHL - Extranodal	Malignant	C34.2-Middle lobe, lung	9719/3: Extranodal NK-/T-cell lymphoma, nasal type	0	None	Beam radiation	No radiation and/or cancer-directed surgery	No/Unknown	Non-Hodgkin Lymphoma	Dead (attributable to this cancer dx)	2	Dead	4th of 4 or more primaries	No	49391845	Married (including common law)	Positive histology	N/A	N/A	N/A	N/A	330	988	98	None; diagnosed at autopsy	NK cell; natural killer cell (1995+)	Blank(s)	Blank(s)	Blank(s)	Blank(s)	Blank(s)	Blank(s)	10	999	Blank(s)	Blank(s)	Stage III	2(b)2.4 NK/T-cell lymph, nasal-type/aggres NK leuk
66 years	White	Female	2015	NHL - Extranodal	Malignant	C34.1-Upper lobe, lung	9719/3: Extranodal NK-/T-cell lymphoma, nasal type	0	Unknown or not applicable	None/Unknown	No radiation and/or cancer-directed surgery	Yes	Non-Hodgkin Lymphoma	Dead (attributable to this cancer dx)	4	Dead	One primary only	Yes	50132490	Married (including common law)	Positive histology	N/A	N/A	N/A	N/A	110	988	98	None; diagnosed at autopsy	NK cell; natural killer cell (1995+)	Blank(s)	Blank(s)	Blank(s)	Blank(s)	Blank(s)	Blank(s)	10	999	Blank(s)	Blank(s)	Stage I	2(b)2.4 NK/T-cell lymph, nasal-type/aggres NK leuk
64 years	White	Male	2001	NHL - Extranodal	Malignant	C34.9-Lung, NOS	9719/3: Extranodal NK-/T-cell lymphoma, nasal type	0	Blank(s)	None/Unknown	No radiation and/or cancer-directed surgery	Yes	Non-Hodgkin Lymphoma	Dead (attributable to this cancer dx)	1	Dead	One primary only	Yes	53900308	Married (including common law)	Positive histology	Blank(s)	Blank(s)	Blank(s)	Blank(s)	Blank(s)	Blank(s)	Blank(s)	Blank(s)	T-cell	Blank(s)	Blank(s)	Blank(s)	Blank(s)	Blank(s)	Blank(s)	Blank(s)	Blank(s)	Blank(s)	Blank(s)	Stage IV	2(b)2.4 NK/T-cell lymph, nasal-type/aggres NK leuk
48 years	Black	Male	2002	NHL - Extranodal	Malignant	C34.1-Upper lobe, lung	9719/3: Extranodal NK-/T-cell lymphoma, nasal type	0	Blank(s)	None/Unknown	No radiation and/or cancer-directed surgery	No/Unknown	Nephritis, Nephrotic Syndrome and Nephrosis	Alive or dead of other cause	2	Dead	One primary only	Yes	54089604	Single (never married)	Positive histology	Blank(s)	Blank(s)	Blank(s)	Blank(s)	Blank(s)	Blank(s)	Blank(s)	Blank(s)	T-cell	Blank(s)	Blank(s)	Blank(s)	Blank(s)	Blank(s)	Blank(s)	Blank(s)	Blank(s)	Blank(s)	Blank(s)	Stage IV	2(b)2.4 NK/T-cell lymph, nasal-type/aggres NK leuk
55 years	White	Male	2002	NHL - Extranodal	Malignant	C34.1-Upper lobe, lung	9719/3: Extranodal NK-/T-cell lymphoma, nasal type	21	Blank(s)	None/Unknown	No radiation and/or cancer-directed surgery	No/Unknown	Chronic Obstructive Pulmonary Disease and Allied Cond	Alive or dead of other cause	89	Dead	One primary only	Yes	54098096	Single (never married)	Positive histology	Blank(s)	Blank(s)	Blank(s)	Blank(s)	Blank(s)	Blank(s)	Blank(s)	Blank(s)	T-cell	Blank(s)	Blank(s)	Blank(s)	Blank(s)	Blank(s)	Blank(s)	Blank(s)	Blank(s)	Blank(s)	Blank(s)	Stage I	2(b)2.4 NK/T-cell lymph, nasal-type/aggres NK leuk
25 years	White	Male	2015	NHL - Extranodal	Malignant	C34.9-Lung, NOS	9719/3: Extranodal NK-/T-cell lymphoma, nasal type	0	None	None/Unknown	No radiation and/or cancer-directed surgery	Yes	Non-Hodgkin Lymphoma	Dead (attributable to this cancer dx)	0	Dead	One primary only	Yes	62816639	Single (never married)	Positive histology	N/A	N/A	N/A	N/A	999	988	98	None; diagnosed at autopsy	NK cell; natural killer cell (1995+)	Blank(s)	Blank(s)	Blank(s)	Blank(s)	Blank(s)	Blank(s)	10	999	Blank(s)	Blank(s)	Unknown	2(b)2.4 NK/T-cell lymph, nasal-type/aggres NK leuk
